# Supplementary material
Source: Springer Nature journal article supplement (https://www.springermedizin.de/resource/supplementary/13089_2014_110_MOESM2_ESM.pdf/9675702)

Z

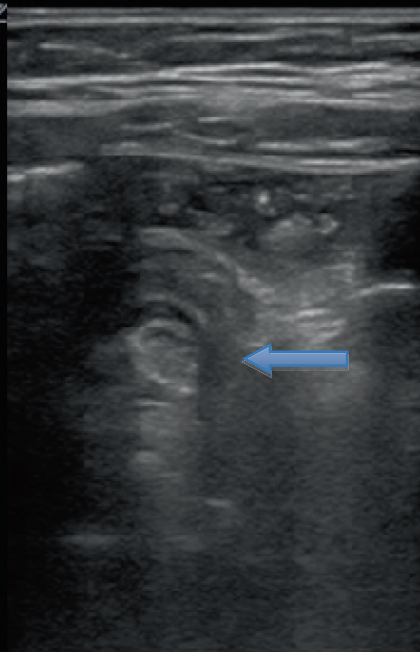

Ped/Abdominal

LB-3/CH7MHz

- DR75/M4/P1

G88/E1/100%

- MI1.5 TIs0.4

6.0 cm

13/13 Hz

△ ZSI 0

Supplement: MOESM2 [file 9675702]
